# Supplementary material for: Droplet-based magnetic bead immunoassay using microchannel-connected multiwell plates (μCHAMPs) for the detection of amyloid beta oligomers
Source: Royal Society of Chemistry journal article supplement (doi:10.1039/c6lc00013d), 2016-01-01
Supplement: c6lc00013d1.pdf [file c6lc00013d1.pdf]

## Supplementary Information

### Droplet-based magnetic bead immunoassay using microchannel-connected multiwell plates ( $\mu$ CHAMPs) for the detection of amyloid beta oligomers

Min Cheol Park,<sup>a,†</sup> Moojong Kim,<sup>a,†</sup> Gun Taek Lim,<sup>b</sup> Sung Min Kang,<sup>b</sup> Seong Soo A An,<sup>c</sup> Tae Song Kim<sup>a</sup> and Ji Yoon Kang<sup>a\*</sup>

<sup>a</sup> Center for BioMicrosystems, Brain Science Institute, Korea Institute of Science and Technology, Seoul 02792, Republic of Korea. \* E-mail: jykang@kist.re.kr

<sup>b</sup> PeopleBio Inc., Seoul 06027, Republic of Korea.

<sup>c</sup> Department of Bionano Technology, Gachon Medical Research Institute, Gachon University, Seongnam 13120, Republic of Korea.

<sup>†</sup> These two authors equally contributed to this work.

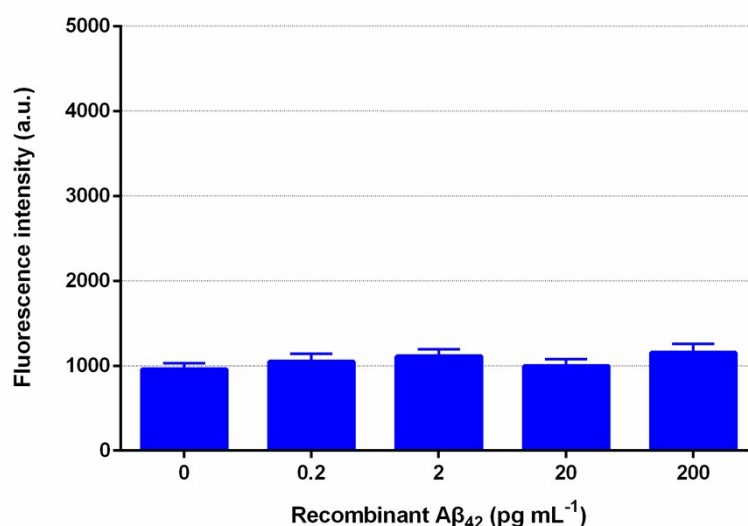

**Supplementary Fig. S1** MDS assay of serially diluted recombinant Aβ<sub>42</sub> peptides (w/o oligomerization step) using the 6-well connected PS- $\mu$ CHAMP with R-O-W-W-O-D droplet order. It shows that there is no significant difference in measured fluorescence intensities ( $n = 4$ ) between different concentrations of Aβ<sub>42</sub> peptides during the MDS assay.
